# Supplementary material
Source: PubMed Central journal article supplement (PMC3744872)

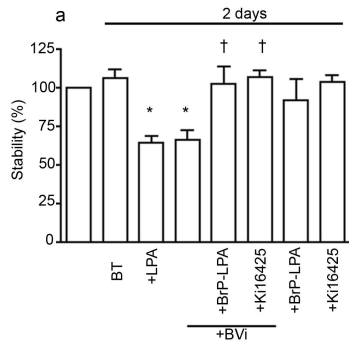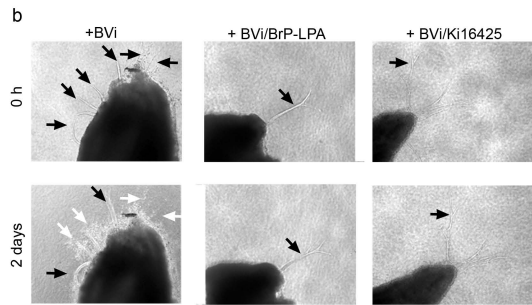

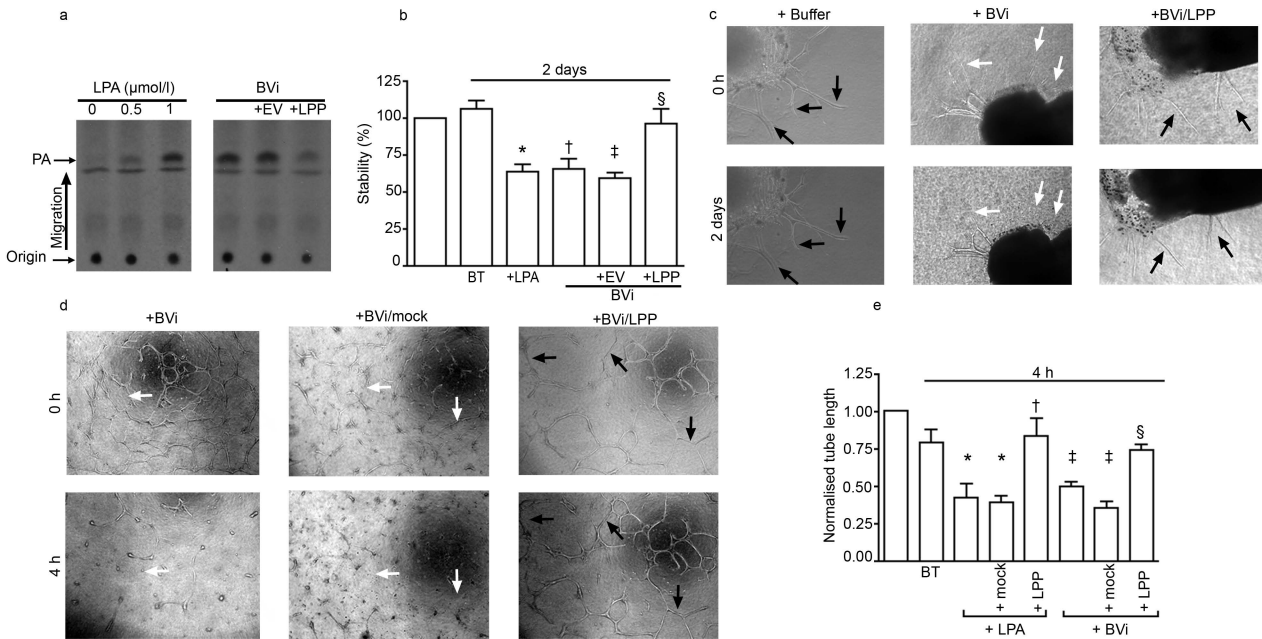

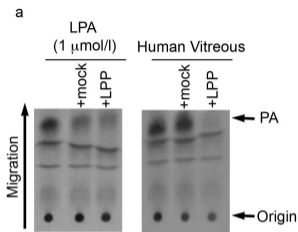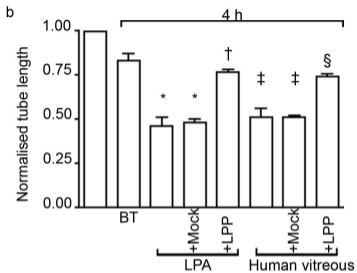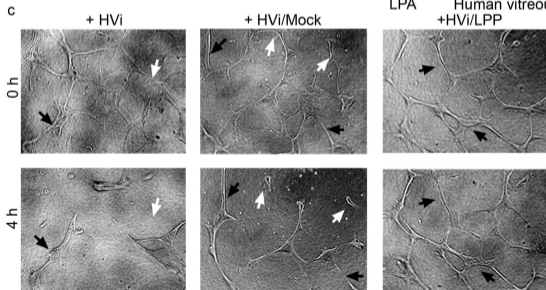

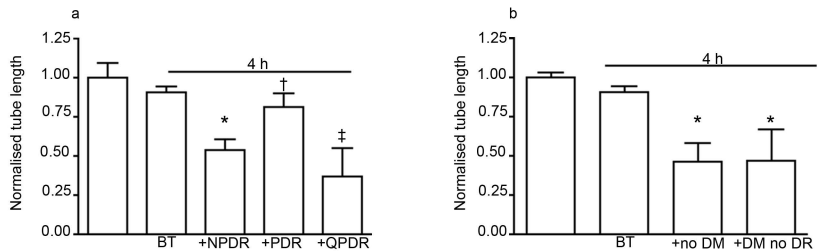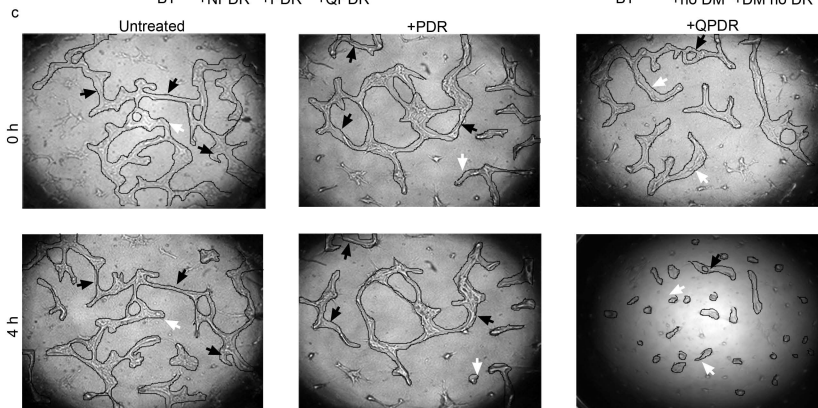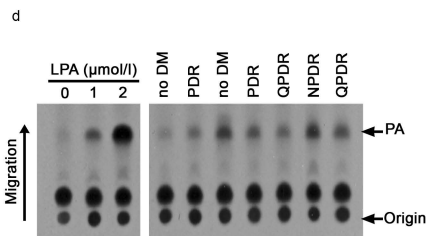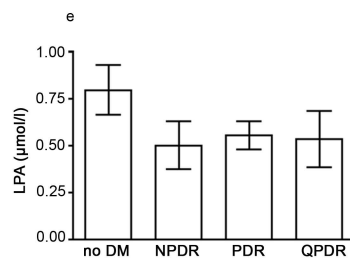

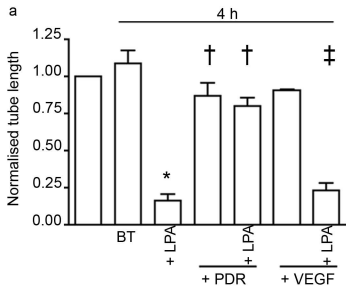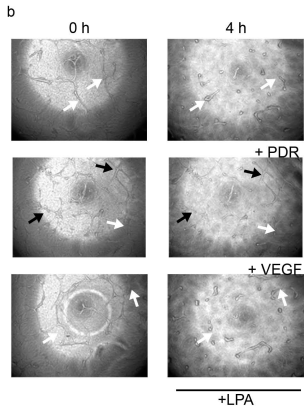

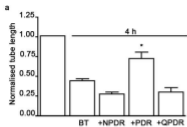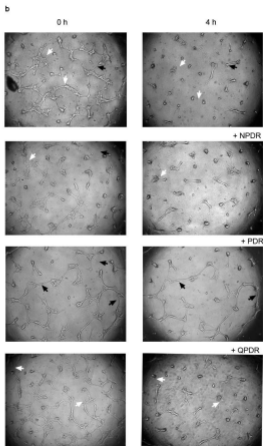

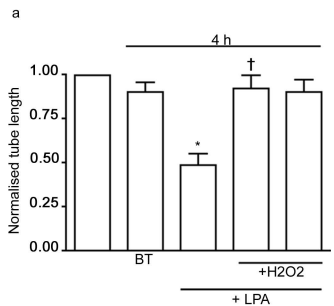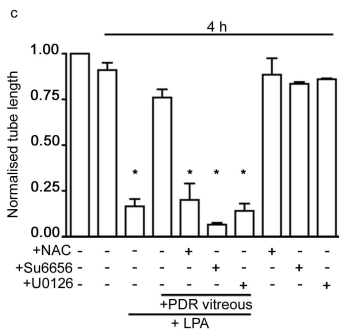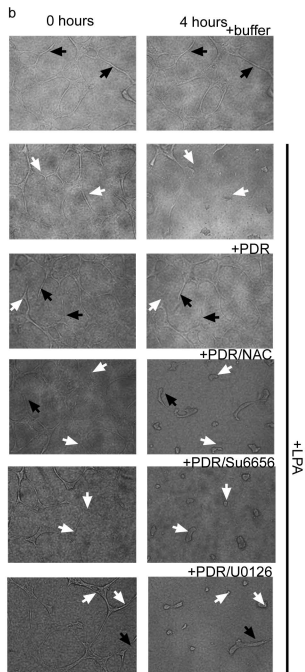

Supplement: NIHMS457602-supplement-125_2013_2884_MOESM1_ESM.pdf [file NIHMS457602-supplement-125_2013_2884_MOESM1_ESM.pdf]

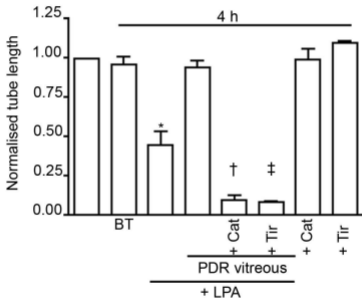

Supplement: NIHMS457602-supplement-125_2013_2884_MOESM2_ESM.pdf [file NIHMS457602-supplement-125_2013_2884_MOESM2_ESM.pdf]
